# Supplementary material for: Punto de vista islámico.
Source: Royal Society of Chemistry journal article supplement (doi:10.1039/d0bm00322k), 2009-01-01
Supplement: d0bm00322k1.pdf [file d0bm00322k1.pdf]

## Support information

### A Medical Adhesive Used in Wet Environment by Blending Tannic

### Acid and Silk Fibroin

Xijie Gao, Qiyuan dai, Longtao Yao, Hua Dong, Qingtao Li\*, Xiaodong Cao\*

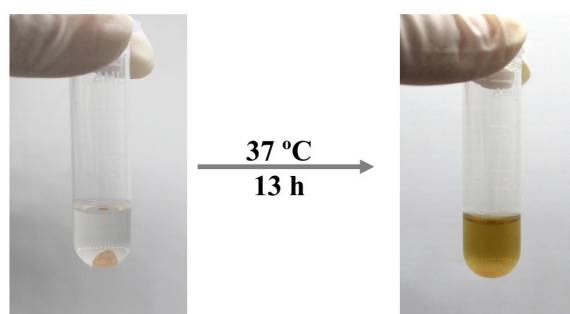

**Fig. S1.** Photographs of TASK before and after dissolution in 5 M urea aqueous solution.

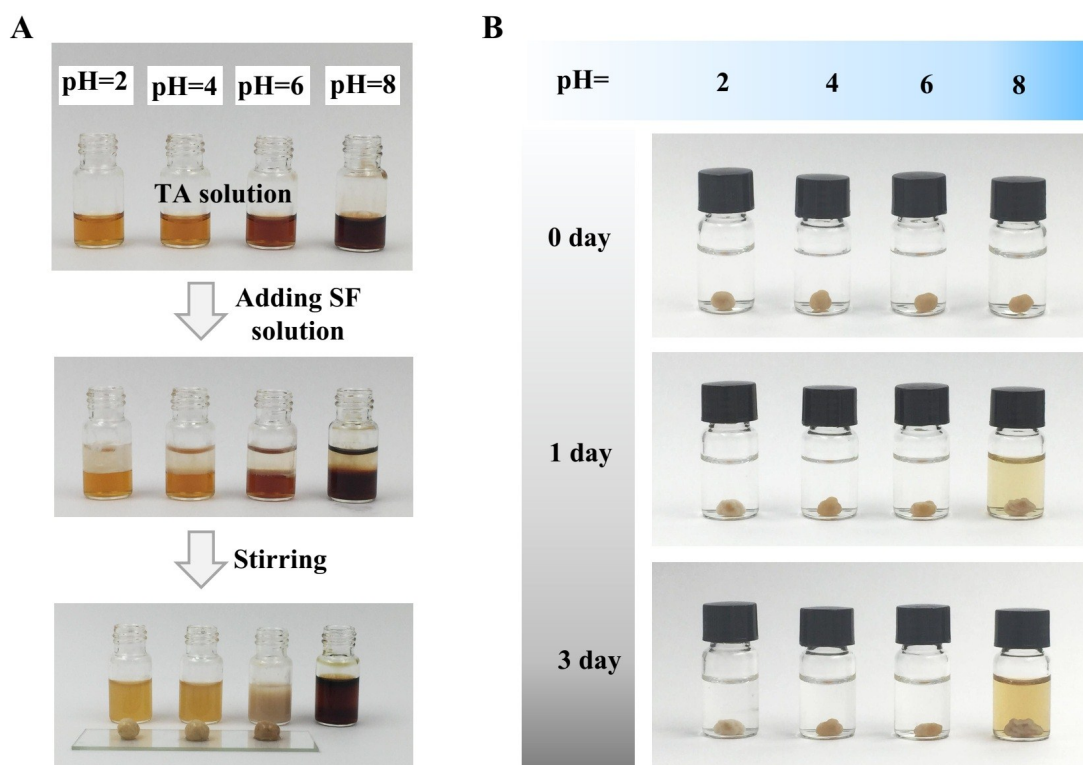

**Fig.S2.** Effect of pH on (A) formation and on (B) degradation of TASK.

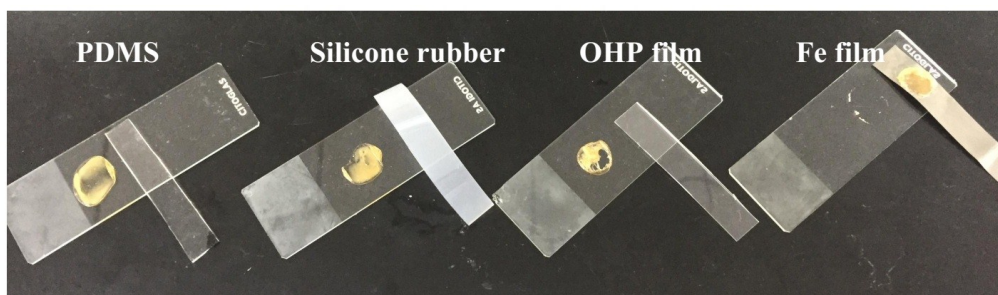

**Fig. S3.** Adhesion of TASK to different substrates.

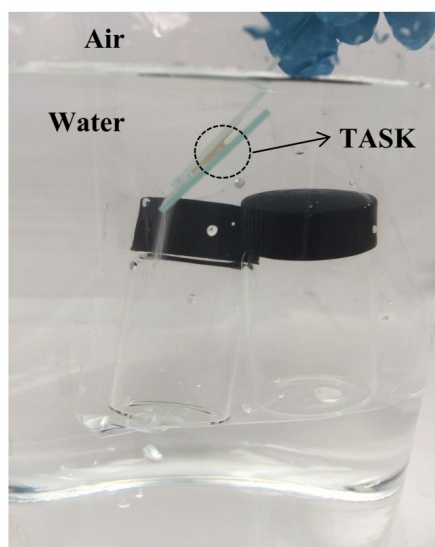

**Fig. S4.** The photograph of the TASK soaking in water adhered to glasses.

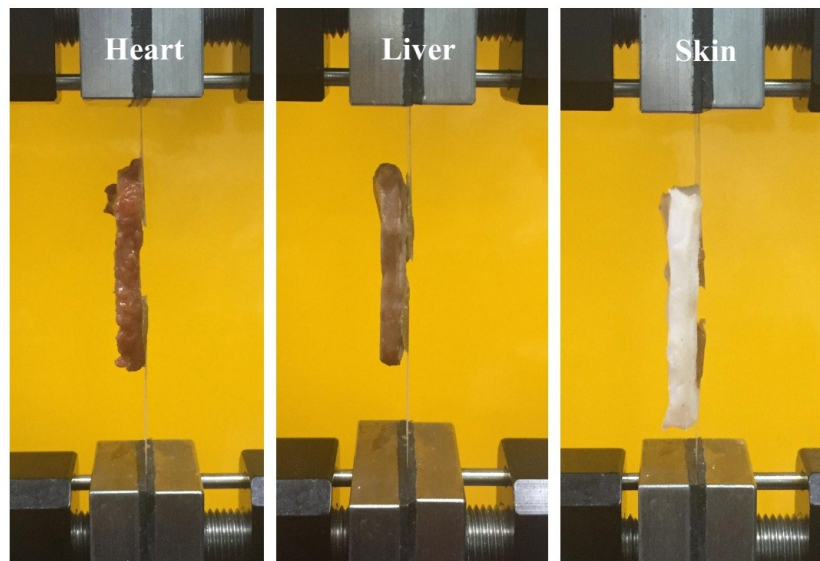

**Fig. S5.** Photographs of heart, liver, and skin for tensile test.

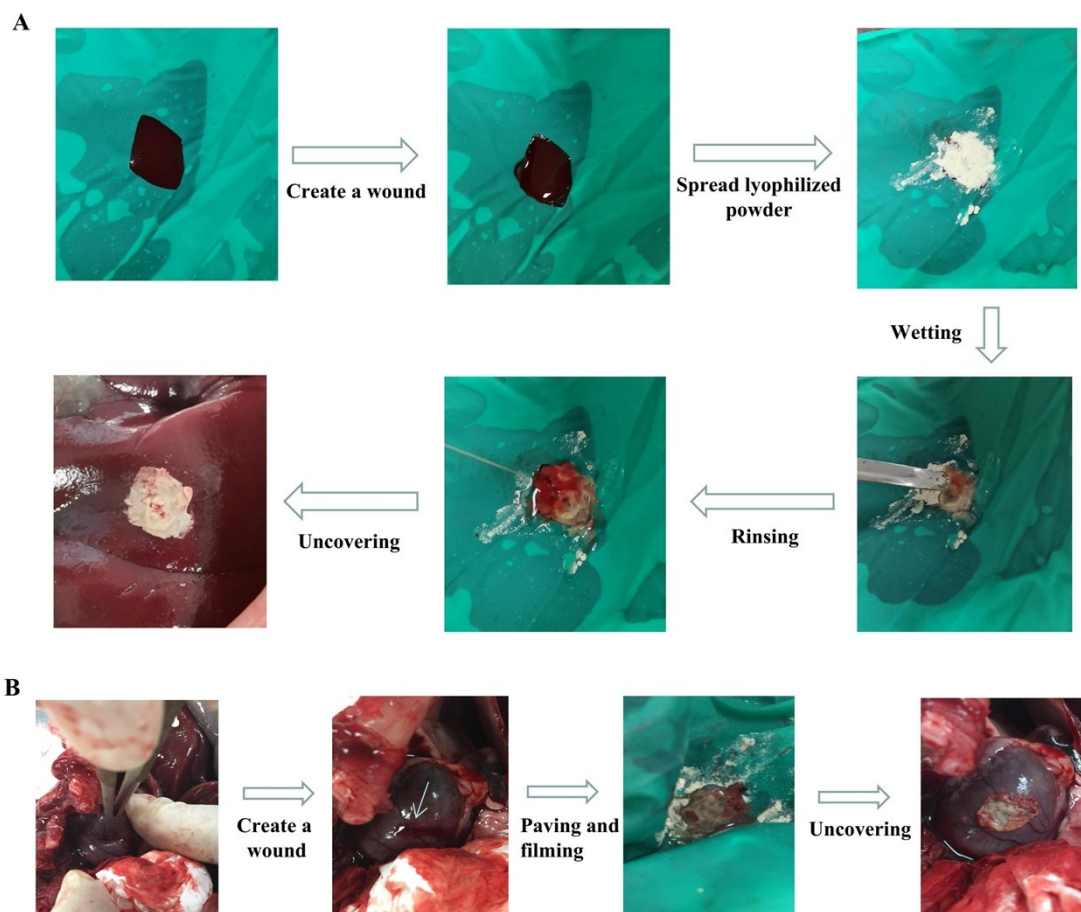

**Fig. S6.** Applying TASK as tissue patch on the liver (A) and heart (B) in vivo.
